# Supplementary material for: Effects of Crystallite Sizes of Pt/HZSM-5 Zeolite Catalysts on the Hydrodeoxygenation of Guaiacol
Source: MDPI journal article supplement (doi:10.3390/nano10112246), 2020-11-12
Supplement: s1 [file s1]

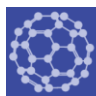

*Supplementary Material*

# Effects of Crystallite Sizes of Pt/HZSM-5 Zeolite Catalysts on the Hydrodeoxygenation of Guaiacol

Haonan Duan <sup>1</sup>, Yajie Tian <sup>1,\*</sup>, Siyuan Gong <sup>2</sup>, Bofeng Zhang <sup>2</sup>, Zongjing Lu <sup>2</sup>,

Yinqiang Xia <sup>3,\*</sup>, Yawei Shi <sup>4</sup> and Congzhen Qiao <sup>1,\*</sup>

<sup>1</sup> Henan Province Engineering Research Center of Catalytic Reaction, College of Chemistry and Chemical Engineering, Henan University, Kaifeng 474004, China; dhn377143955@163.com (H.D)

<sup>2</sup> Key Laboratory for Green Chemical Technology of Ministry of Education, School of Chemical Engineering and Technology, Tianjin University, Tianjin 300072, China; gsygsy@tju.edu.cn (S.G.); zhangbofeng@tju.edu.cn (B.Z.); zongjinglu@tju.edu.cn (Z.L.)

<sup>3</sup> College of Food Science and Engineering, Northwest A&F University, Yangling 712100, China

<sup>4</sup> College of Environmental Science and Engineering, Dalian Maritime University, Dalian 116026, China; shiyawei@tju.edu.cn

\* Correspondence: yjtian@henu.edu.cn (Y.T.); xiatengyu@163.com (Y.X.); qiaocongzhen@henu.edu.cn (C.Q.); Tel.: +86-371-2388-1589 (Y.T.)

### 1.1. Materials

Aluminum sulfate hydrate ( $\text{Al}_2(\text{SO}_4)_3 \cdot 18\text{H}_2\text{O}$ ,  $\geq 98.0\%$ ), tetraethyl orthosilicate (TEOS,  $\geq 98\%$ ), ammonium nitrate ( $\text{NH}_4\text{NO}_3$ ,  $\geq 99.0\%$ ), sodium hydroxide ( $\text{NaOH}$ ,  $\geq 99.0\%$ ), sulfuric acid ( $\text{H}_2\text{SO}_4$ , 95.0–98.0%) were supplied by Guangfu Chemical Reagent Company (Tianjin, China). 1-Bromodocosane ( $\geq 98.0\%$ ), diethyl ether (DEE,  $\geq 99.0\%$ ) and 1-bromohexane ( $\geq 98\%$ ) were supplied by Sigma-Aldrich. N, N, N', N'-tetramethyl-1,6-diaminohexane ( $\geq 98\%$ ), tetrapropylammonium hydroxide (TPAOH, 25% in  $\text{H}_2\text{O}$ ), acetonitrile (HPLC grade) and toluene ( $\geq 99.0\%$ ) were purchased from J&K.

### 1.2. Synthesis of Nanosheets HZSM-5

The polyquaternary ammonium surfactant was synthesized following a reported procedure as follows: 18.5 g of 1-bromodocosane and 86 g of N, N, N', N'-tetramethyl-1,6-diaminohexane were dissolved in 500 mL of acetonitrile/toluene mixture (1:1, v/v) in the glove box. The mixture was then transferred out of the glove box and reacted at 70 °C under magnetic stirring for 10 h. After cooling to ambient temperature, the precipitated product was filtered, washed with DEE, and dried in a vacuum oven at 70 °C overnight. 28 g of the resultant product and 12.5 g of 1-bromohexane were dissolved in 150 mL of acetonitrile in the glove box and then refluxed at 85 °C under magnetic stirring (500 rpm) for 10 h in a fume hood. The obtained product was the surfactant  $[\text{C}_{22}\text{H}_{45}\text{N}^+(\text{CH}_3)_2\text{C}_6\text{H}_{12}\text{N}^+(\text{CH}_3)_2\text{C}_6\text{H}_{13}](\text{Br}^-)_2$ , designated as  $\text{C}_{22-6-6}$ .

The recipe used for synthesis of nanosheet HZSM-5 zeolites was as follows:  $30\text{Na}_2\text{O}/\text{Al}_2\text{O}_3/100\text{SiO}_2/10\text{C}_{22-6-6}/4000\text{H}_2\text{O}/18\text{H}_2\text{SO}_4$ . Typically, the hydrothermal synthesis was performed by dissolving 0.7 g NaOH in 3.0682 g DI water, dissolving 0.4235 g  $\text{H}_2\text{SO}_4$  in 4.4471 g DI water, and subsequently adding the basic solution dropwise to the acidic solution under vigorous stirring. After cooling to ambient temperature, a desired amount of  $\text{Al}_2(\text{SO}_4)_3 \cdot 18\text{H}_2\text{O}$  was dissolved in the mixture. TEOS was then added to the mixture and the mixture was stirred vigorously at room temperature for 20 h using a magnetic stirrer. Finally, the mixture was mixed with a  $\text{C}_{22-6-6}$  solution which was prepared by dissolving 2.1163 g  $\text{C}_{22-6-6}$  in 13.476 g DI water at 60 °C. After continuously stirring for 4 h at room temperature, the resultant gel was transferred into a Teflon-lined stainless-steel autoclave, followed by crystallization for 5 days in rotating at 150 °C. After crystallization, the zeolite product was filtered, washed with DI water, and dried at 120 °C overnight. All samples were calcined in dry air at 550 °C (increasing at 1 °C/min) for 6 h.

### 1.3. Synthesis of Bulky HZSM-5

The starting mixture had a molar composition of  $1\text{Al}_2\text{O}_3: 100\text{SiO}_2: 40\text{TPAOH}: 3000\text{H}_2\text{O}$ . Tetraethylorthosilicate (TEOS, 98%) was used as the silica source, and aluminum sulfate ( $\text{Al}_2(\text{SO}_4)_3 \cdot 18\text{H}_2\text{O}$ , 98%) was used as the alumina source. The crystallization was conducted at 170 °C for 48 h in a teflon-lined stainless steel autoclave under rotation (120 r/min). The solid product was recovered by centrifugation and washed with deionized water, until the mother liquid showed a pH value of 7–8, followed by drying at 110 °C overnight and calcination at 550 °C for 8 h in air.

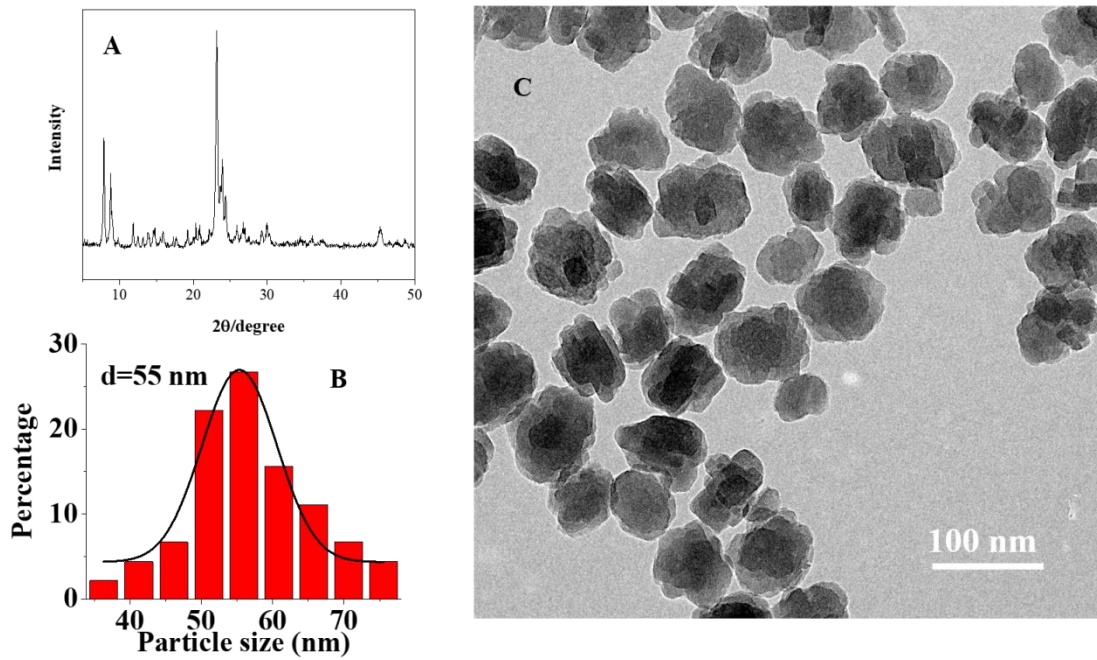

**Figure S1.** XRD patterns (A), size distributions (B) and TEM images (C) of silicalite-1 nanocrystal seeds.

### 2.1. Calculation of Pt Dispersion

The dispersion of Pt nanoparticles ( $D\%$ ) was calculated as:

$$D(\%) = \frac{n \times M_{Pt}}{X \times Y}$$

where  $n$  is the adsorbed amount of CO per gram of catalyst.  $M_{Pt}$  is the molar mass of Pt.  $X$  is the Pt loading and  $Y$  is deemed as 1, assuming an adsorption of one CO molecule per Pt atom. The average Pt particle size ( $P$ ) was estimated as:

$$P = \frac{1}{\rho \times S \times D}$$

where  $\rho$  is the density of Pt nanoparticles.  $S$  represents the maximum surface area of Pt nanoparticles and  $D$  stands for the metal dispersion. All these results were calculated by the AMI-300 Catalyst Characterization System (Altamira Instruments).

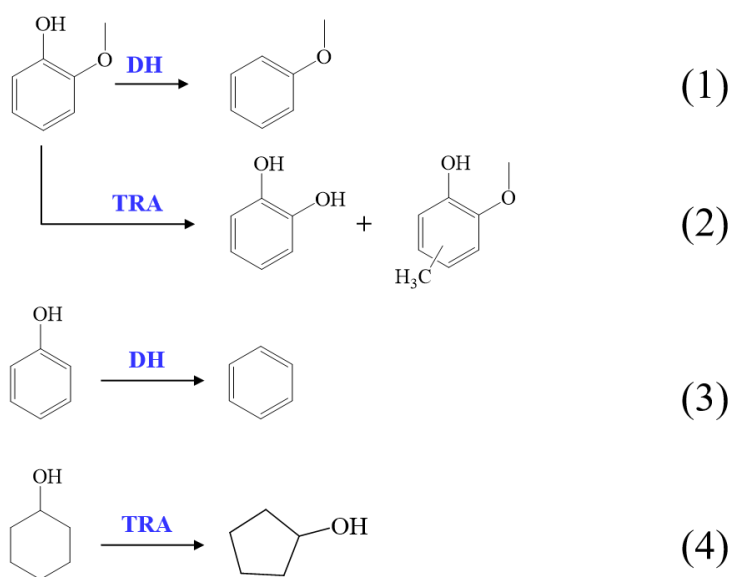

**Figure S2.** Reaction pathway of guaiacol and its-intermediates.

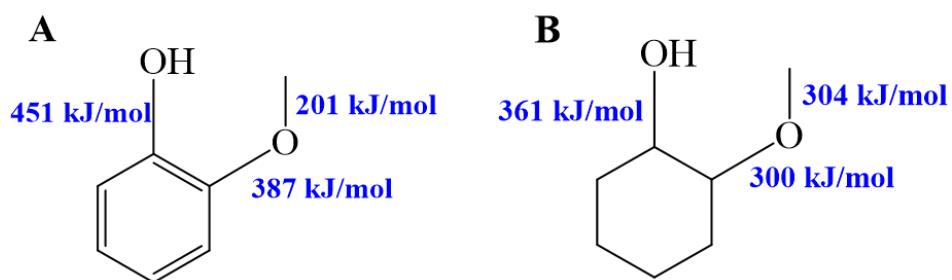

**Figure S3.** The molecular schematic diagram of (A) guaiacol and (B) 2-Methoxycyclohexanol. Bond dissociation energies (BDEs, KJ/mol) of C-O bands calculated at B3LYP/6-311G (d, p) level.

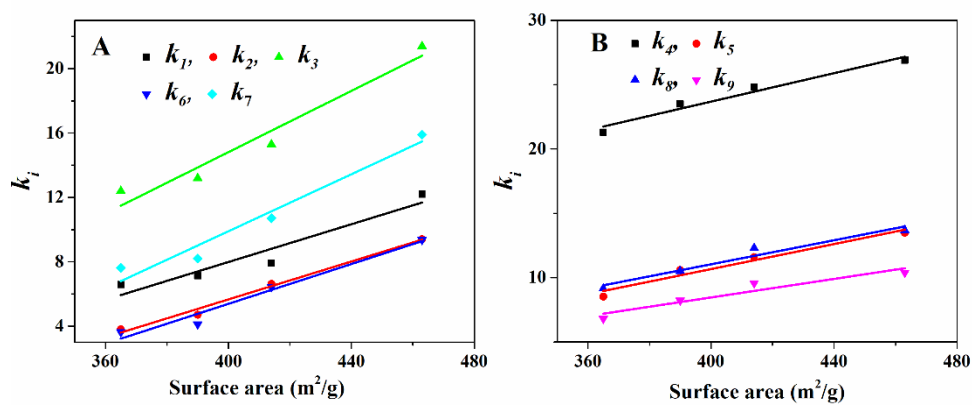

**Figure S4.** The increasing rate of  $k_i$  under different prepared Pt loaded HZSM-5 zeolite catalysts: (A)  $k_1$ ,  $k_2$ ,  $k_3$ ,  $k_6$ ,  $k_7$ ; (B)  $k_4$ ,  $k_5$ ,  $k_8$ ,  $k_9$ .

**Table S1.** The increasing rate of  $k_i$  under different prepared Pt loaded HZSM-5 zeolite catalysts.

| $k_i$  | $k_1$ | $k_2$ | $k_3$ | $k_4$ | $k_5$ | $k_6$ | $k_7$ | $k_8$ | $k_9$ |
|--------|-------|-------|-------|-------|-------|-------|-------|-------|-------|
| $k_i'$ | 0.058 | 0.059 | 0.095 | 0.054 | 0.048 | 0.062 | 0.088 | 0.046 | 0.036 |
